# Supplementary material for: Parallel damage in mitochondrial and lysosomal compartments promotes efficient cell death with autophagy: The case of the pentacyclic triterpenoids
Source: PubMed Central journal article supplement (PMC4515638; doi:10.1038/srep12425), 2015-07-27
Supplement: srep12425-s1.pdf [file srep12425-s1.pdf]

**Parallel damage in mitochondrial and lysosomal compartments promotes efficient cell death with autophagy: The case of the pentacyclic triterpenoids**

Waleska K. Martins<sup>1</sup>, Érico T. Costa<sup>2</sup>, Mário C. Cruz<sup>3</sup>; Beatriz S. Stolf<sup>3</sup>, Ronei Miotto<sup>4</sup>, Rodrigo M. Cordeiro<sup>4</sup>, Maurício S. Baptista<sup>1,\*</sup>

<sup>1</sup>Instituto de Química, Universidade de São Paulo, Brazil; <sup>2</sup>Ludwig Institute for Cancer Research (LICR) at Centro de Oncologia Molecular, Hospital Sírio Libanês, São Paulo, Brazil; <sup>3</sup>Instituto de Ciências Biomédicas, Universidade de São Paulo, Brazil; <sup>4</sup>Centro de Ciências Naturais e Humanas, UF-ABC, Brazil.

To whom the correspondence should be addressed: Maurício S. Baptista; Address: Department of Biochemistry, Sao Paulo University, Av. Prof. Lineu Prestes 748 room 1262. CEP 05508-000 Sao Paulo, Brazil. Phone: (55) 11 30918952; FAX: (55) 11 38155579; E-mail: [baptista@iq.usp.br](mailto:baptista@iq.usp.br)

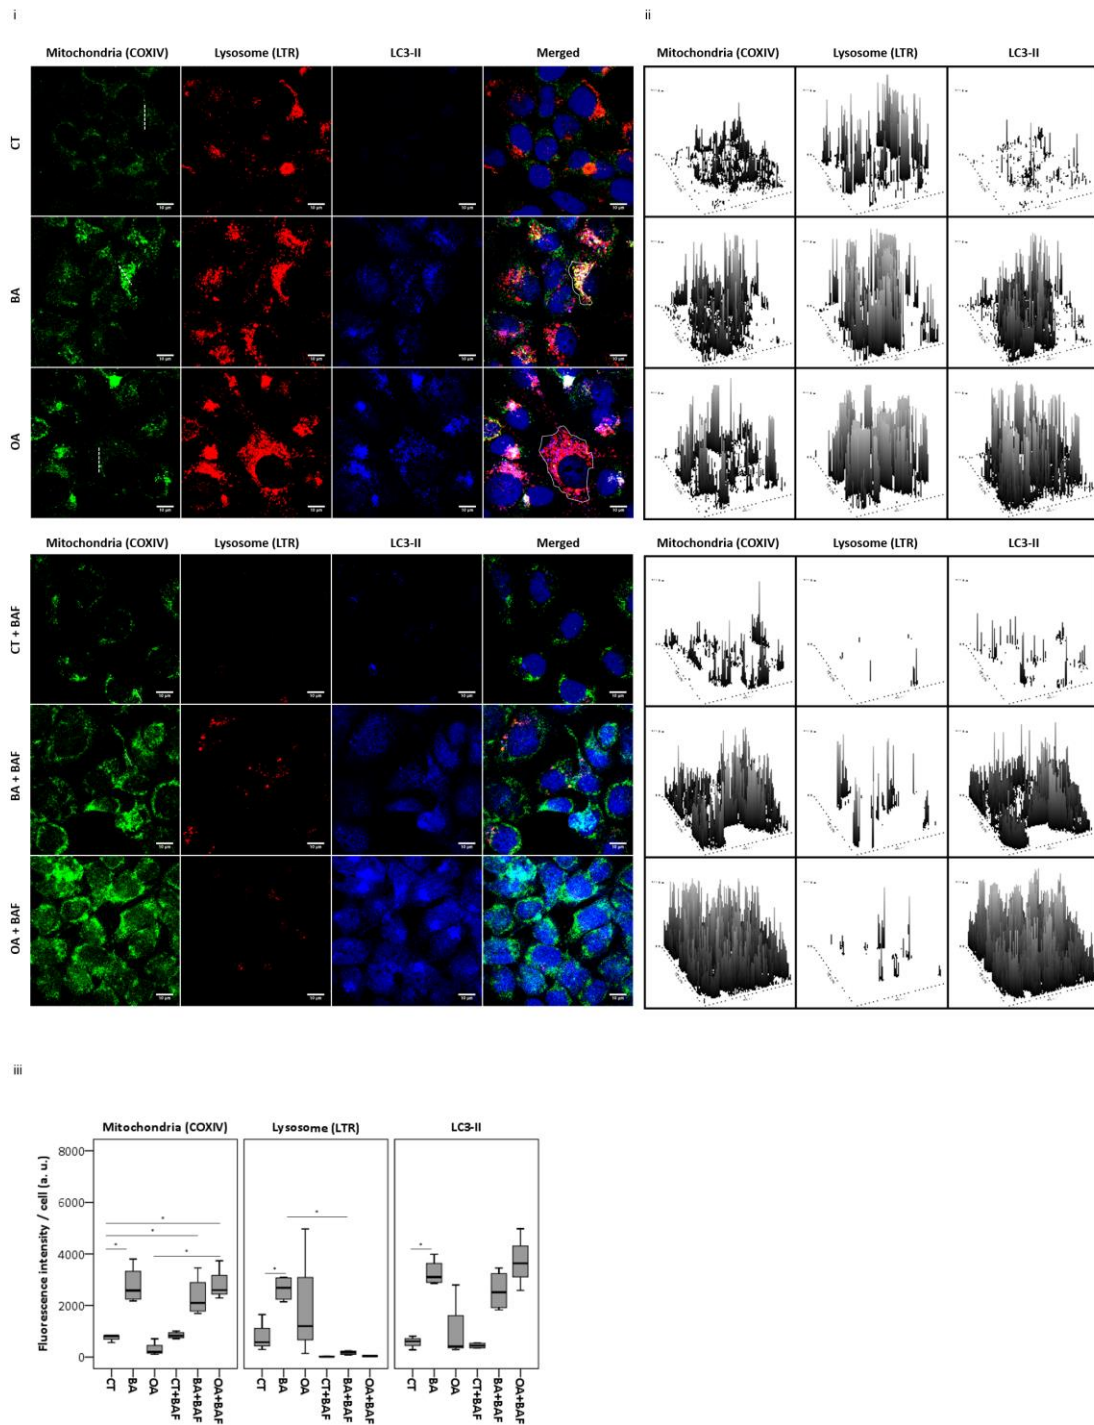

**Supplementary Figure S1. Analysis of autophagic removal of mitochondria in HaCaT keratinocytes after treatment of triterpenoids.** Micrographs of treated-cells at T1 with DMSO (control) and triterpenoids (20  $\mu$ M) in presence or absence of BAF (2  $\eta$ M) treatment. Following staining of lysosomes with LTR (red), cells were immunostained for endogenous LC3-II (blue) and for the mitochondrial marker COXIV

(green). At right panel, we represented their respective surface plots (ii) and box-plots of multiple images (iii). All results obtained from at least three independent experiments and expressed as mean values  $\pm$  standard error. Multiple statistical comparisons were calculated by ANOVA test, and the P value for each pairwise group was determined by Dunnett's T3 (high variance between groups) or Bonferroni (low variance between groups) post-hoc test. Significance difference ( $p < 0.05$ ) was depicted by asterisk.

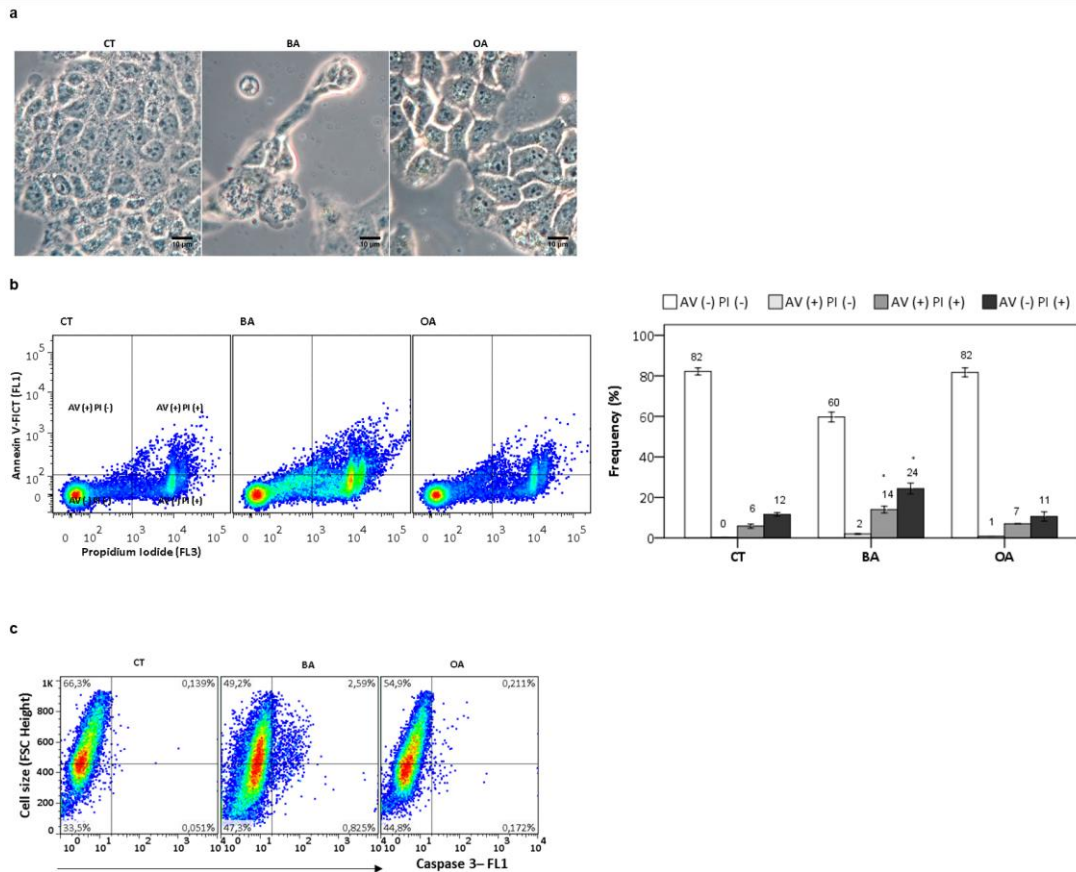

**Supplementary Figure S2. Analysis of apoptosis in HaCaT keratinocytes after treatment of triterpenoids.** (a) Micrographs of treated cells with DMSO (control) and triterpenoids (20  $\mu$ M) at T1. (b) At T1 with DMSO (control) and triterpenoids (20  $\mu$ M), following FACS treated cells were gated according to the parameters Annexin V (FL1) and Propidium Iodide (FL3). Representative pseudo-color scatter-plot showed the subpopulations [AV-/PI-; AV+/PI-; AV+/PI+; AV-/PI+] (left panel). The mean frequency of these subpopulations were represented by bars (right panel). (c) At T1 with DMSO (control) and triterpenoids (20  $\mu$ M), following FACS the correlated distribution of treated cells according to the two parameters cell size and active Caspase-3 was represented by pseudo-color scatter-plots. In pseudo-color depiction, red represented higher frequency of cell population with indicative phenotype. All results obtained from at least three independent experiments and expressed as mean values  $\pm$  standard error. Multiple statistical comparisons were calculated by ANOVA test, and the P value for

each pairwise group was determined by Dunnett's T3 (high variance between groups) or Bonferroni (low variance between groups) post-hoc test. Significance difference ( $p < 0.05$ ) was depicted by asterisk.
